# Supplementary material for: CMC-WDTK: CpG methylation change prediction by a weight-sharing dual-branch Transformer-Kolmogorov–Arnold network model
Source: Research Square preprint supplement (doi:10.21203/rs.3.rs-7586988/v1), 2025-10-17
Supplement: Supplementary file 1 [file 5366bea92af24316fc0bb44d.xlsx]

## Sheet: Sheet1
Supplemental Table S2. The number of CpG sites of each dataset used in study
Dataset	The number of ASM Pairs	The number of unique CpGs	The number of positive samples	The number of negative samples
OCI-LY7	396392	353746	136699	261540
Esophagus	92239	82037	24321	69095
Intestine	365904	325333	97409	378475
Pancreas	70738	66252	14461	60608
MCF7	225256	199462	59132	168032
Hela	26070	24370	6298	19926
HepG2	105662	97113	34438	71794
Gastric	14940	14551	2052	14985
