# Supplementary material for: CMC-WDTK: CpG methylation change prediction by a weight-sharing dual-branch Transformer-Kolmogorov–Arnold network model
Source: Research Square preprint supplement (doi:10.21203/rs.3.rs-7586988/v1), 2025-10-17
Supplement: Supplementary file 2 [file ad2e22b10d2b02d2b796ee4b.xlsx]

## Sheet: Sheet1
Supplemental Table S1. Datasets used in this study
Dataset type	Dataset info	Sample ID	Sample type
Cell line	MCF7	GSM1328112	Cancer
Cell line	HepG2	GSM2308631	Cancer
Cell line	OCI-LY7	GSM3634062	Cancer
Cell line	Hela	GSM6658935	Cancer
Tissue	Esophagus	GSM6423671	Cancer
		GSM6423670	Cancer
Tissue	Gastric	GSM5064723	Cancer
		GSM5064724	Normal
		GSM5064727	Cancer
		GSM5064725	Normal
Tissue	Pancreas	GSM6915632	Cancer
		GSM6915641	Normal
		GSM6915638	Normal
		GSM6915631	Cancer
		GSM6915644	Cancer
		GSM2330157	Normal
		GSM2131362	Cancer
		GSM6915640	Normal
		GSM6915643	Cancer
Tissue	Intestine	GSM1279519	Normal
		GSM1279521	Cancer
		GSM3317488	Cancer
		GSM3930323	Cancer
		GSM3930318	Cancer
		GSM3930337	Cancer
		GSM7818543	Cancer
		GSM3930314	Cancer
		GSM7818549	Cancer
		GSM7818551	Cancer
		GSM3930313	Normal
		GSM4286779	Cancer
		GSM6927778	Cancer
		GSM7818544	Cancer
		GSM7818545	Cancer
		GSM7818546	Cancer
		GSM2579643	Cancer
		GSM7516992	Cancer
		GSM2579641	Cancer
		GSM7818553	Cancer
		GSM7517010	Cancer
		GSM7516977	Cancer
		GSM7516974	Cancer
		GSM7516995	Cancer
		GSM7516956	Cancer
		GSM7949322	Cancer
		GSM7516959	Cancer
		GSM7516953	Cancer
		GSM7818550	Cancer
		GSM6927780	Normal
		GSM6927779	Cancer
		GSM7818561	Cancer
		GSM6927781	Normal
		GSM7818556	Cancer
